# Supplementary material
Source: publisher figshare collection journal article supplement (https://acs.figshare.com/ndownloader/files/6433971)
Supplement: Supplementary file 1 [file 6433971]

## Sheet: Table S1
Supplemental Table S1:
m/z Values Detected in Medicago Mature Nodules (DHB matrix)
905.454
909.432
911.447
911.449
915.255
919.432
921.446
931.23
935.425
937.421
944.373
947.499
949.516
951.401
951.495
959.573
960.349
961.242
963.473
963.489
965.51
967.471
967.517
975.547
978.357
979.49
981.484
981.523
991.526
993.503
995.485
997.5
1000.57
1007.5
1009.48
1011.48
1012.48
1017.32
1019.44
1023.28
1025.55
1027.45
1033.42
1051.51
1067.48
1069.58
1091.54
1107.51
1113.61
1127.57
1143.54
1145.47
1146.6
1157.63
1160.63
1163.47
1176.6
1177.54
1193.52
1227.39
1261.76
1285.7
1287.7
1299.71
1321.7
1331.54
1337.67
1363.7
1379.68
1407.59
1505.75
1521.72
1537.1
1538.12
1540.13
1542.15
1545.17
1564.13
1566.14
1572.19
1586.21
1678.65
1866.02
1953.06
1976.04
1991.01
1992.02
2013
2030.01
2068.08
2107.09
2233.78
2233.81
2249.76
2249.77
2249.78
2264.9
2532.05
2532.06
2554.03
2555.03
2570
2571.02
2592.99
2646.09
2646.11
2668.07
2669.08
2684.05
2964.38
3292.52
3468.47
3589.13
